# Supplementary material for: A new electrodeposition approach for preparing polyoxometalates-based electrochromic smart windows
Source: Royal Society of Chemistry journal article supplement (doi:10.1039/c2ta00486k), 2012-11-15
Supplement: c2ta00486k.pdf [file c2ta00486k.pdf]

## Supporting informations

### A new electrodeposit approach for preparing polyoxometalates-based electrochromic smart windows

Shi-Ming Wang, Lin Liu, Wei-Lin Chen\*, Zhi-Ming Zhang\*, Zhong-Min Su, En-Bo Wang \*

#### Experimental

**Materials:**  $(\text{NH}_4)_{14}[\text{NaP}_5\text{W}_{30}\text{O}_{110}] \cdot 31\text{H}_2\text{O}$  and  $\text{Na}_9[\text{NaS}_5\text{W}_{30}\text{O}_{110}] \cdot 25\text{H}_2\text{O}$  were prepared according to literature procedures.<sup>a,b</sup> The  $\text{TiO}_2$  paste with particle size of 18nm was bought from Dyesol. FTO glass ( $14 \Omega/\square$ , Nippon Sheet Glass) was purchased from Heptachroma (Dalian, China). The electrolyte is 0.1M LiI in propylene carbonate. The other reagents were all purchased from Aladdin.

**Instruments:** Electrochemical experiments were performed on CS350 electrochemistry station (CH Instruments, Wuhan CorrTest<sup>®</sup> Instrument Corporation, China). X-ray photoelectron spectra (XPS) analyses were performed on a VG ESCALABMKII spectrometer with an Mg-K $\alpha$  (1253.6 eV) achromatic X-ray source. Scanning electron microscope (SEM, JEOL JSM-840 operated at 20 kV). Atomic force microscopy (AFM) measurements were performed in air with a SPI3800N Probe Station. Visible light absorption spectra and transmittance spectra were obtained with a Varian Cary 500 UV-vis NIR spectrometer. Raman scattering spectra were carried out on Jobin-Yvon HR800 Raman spectrometer with an  $\text{Ar}^+$  laser source of 488 nm wavelength in a macroscopic configuration.

**Preparation of the EC electrode:** The  $\text{TiO}_2$  film was prepared using the screen printing method. Print twice to obtain a film with the thickness of ca.4 $\mu\text{m}$ . The electrodeposition process is as follows: the counter electrode is Pt wire; the reference electrode is Ag/AgCl and the  $\text{TiO}_2$  film acts as working electrode. The  $\text{TiO}_2$  film was immersed in the  $\text{X}_5\text{W}_{30}$  ( $\text{X}=\text{P}, \text{S}$ ) aqueous solution (pH=2.0 0.7mM), then scanned using cyclic voltammogram method between -1.0 and 0.3V at a scan rate of 100  $\text{mV s}^{-1}$  for 30 cycles. After that, the film was rinsed with deionized water and dried with hot air, then the film was placed in the oven heat to 150  $^\circ\text{C}$  for 30min.

**Assemble of the EC smart window:** A bare FTO with a hole act as the counter electrode. The device was sealed with Surlyn film (45 $\mu\text{m}$ ) the electrolyte was injected from the hole of the FTO. The hole was sealed with another thin glass.

- a I. Creaser, M. C. Heckel, R. J. Neitz, M. T. Pope, *Inorg. Chem.* 1993, **32**, 1573.  
b Z.M. Zhang, S. Yao, Y.G. Li, X.B. Han, Z.M. Su, Z.S. Wang, E.B. Wang, *Chem. Eur. J.* 2012, 18, 9184.

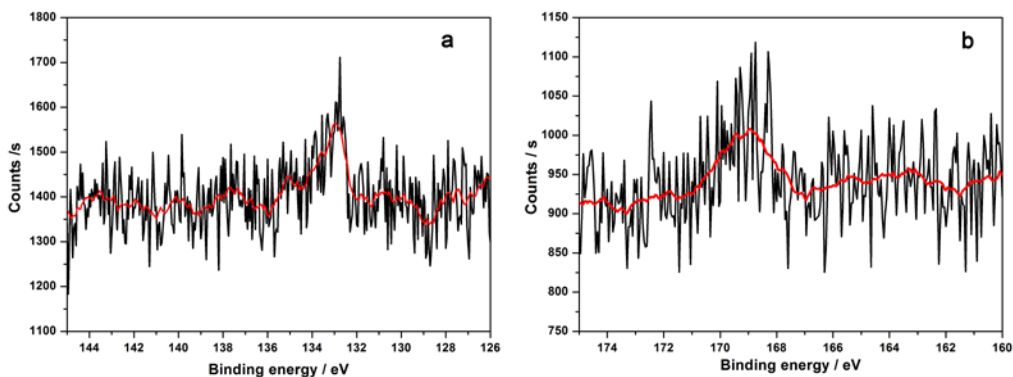

**Figure S1** The XPS spectrum of P atom in the  $P_5W_{30}$  based EC electrode (a) and the XPS spectrum of S atom in the  $S_5W_{30}$  based EC electrode (b).

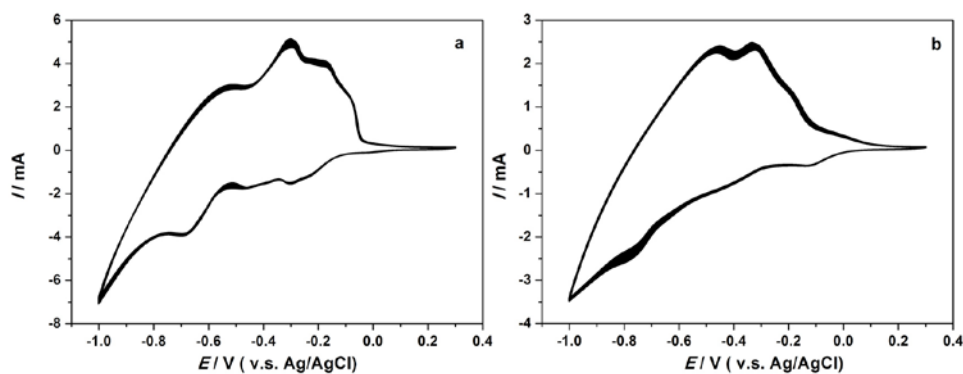

**Figure S2** The 100 cycles of CV test of the  $P_5W_{30}/TiO_2$  (a) and  $S_5W_{30}/TiO_2$  (b) film in  $LiClO_4$  aqueous solution. (pH=3 adjusted by HCl)

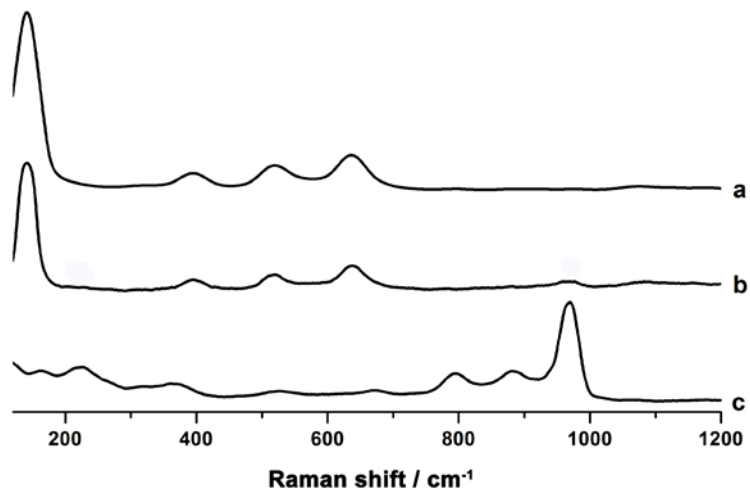

**Figure S3** Raman scattering spectra of bare TiO<sub>2</sub> substrate (a), P<sub>5</sub>W<sub>30</sub>-based electrode (b) and pure P<sub>5</sub>W<sub>30</sub> (c)

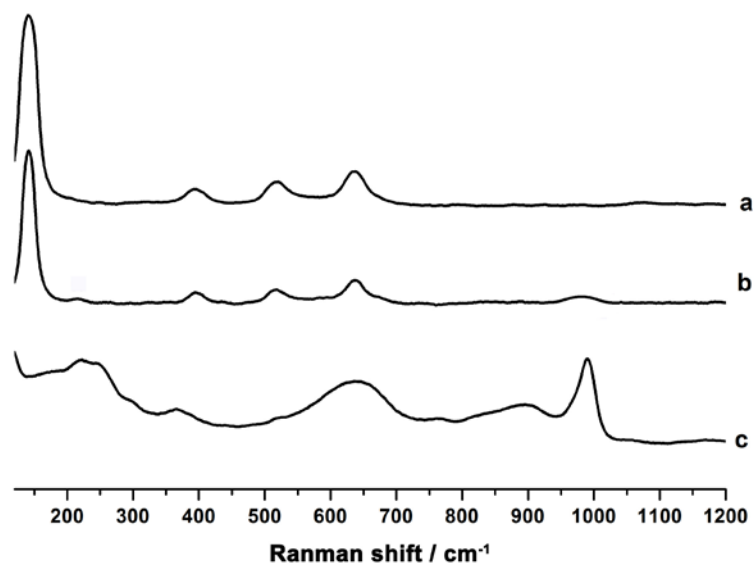

**Figure S4** Raman scattering spectra of bare TiO<sub>2</sub> substrate (a), S<sub>5</sub>W<sub>30</sub>-based electrode (b) and pure S<sub>5</sub>W<sub>30</sub> (c)

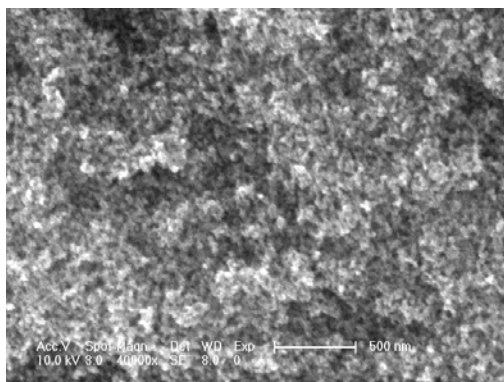

**Figure S5** the SEM image of the surface of the as-prepared  $\text{TiO}_2$  film.

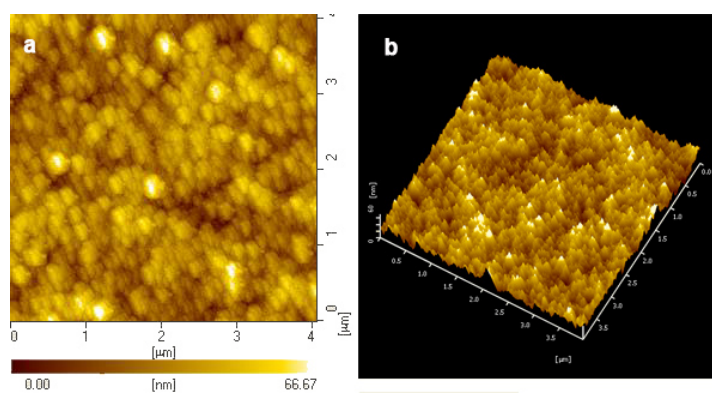

**Figure S6** the AFM image of the as-prepared  $\text{TiO}_2$  film (a) and the the 3D AFM images of the as-prepared  $\text{TiO}_2$  film (b).

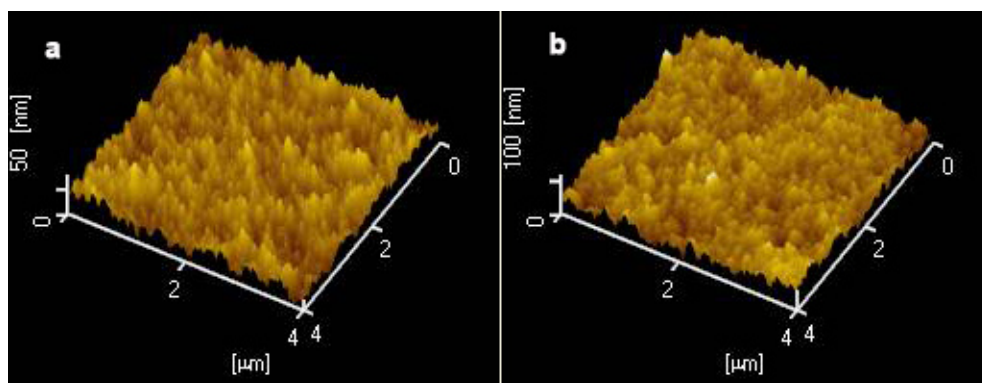

**Figure S7** the 3D AFM images of the  $\text{P}_5\text{W}_{30}$  (a) and  $\text{S}_5\text{W}_{30}$  (b) based EC electrodes.

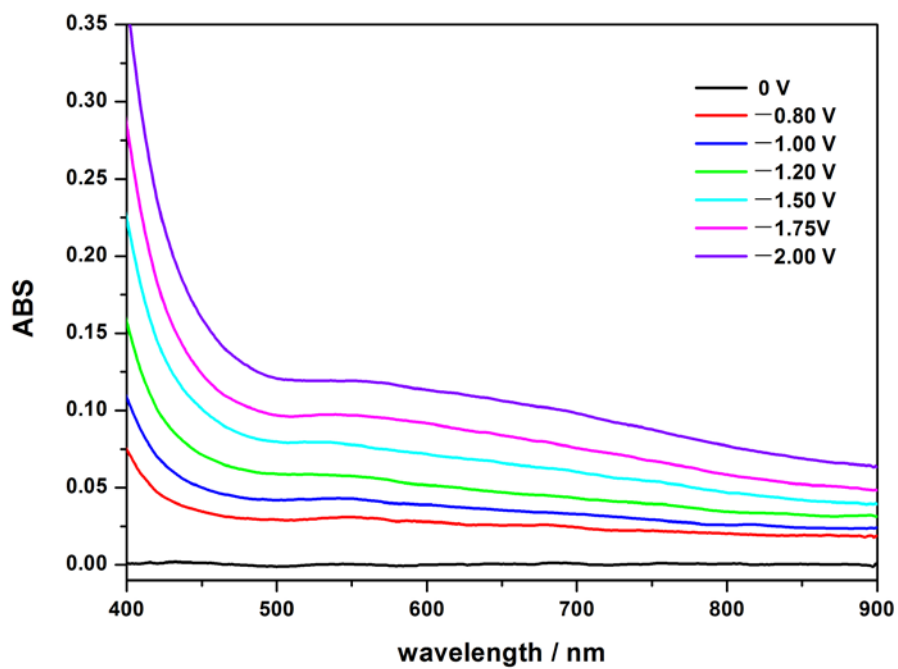

**Figure S8** Visible spectra of the smart window based on  $S_5W_{30}$  under different potentials ranging from -0.8 to -2.0V.

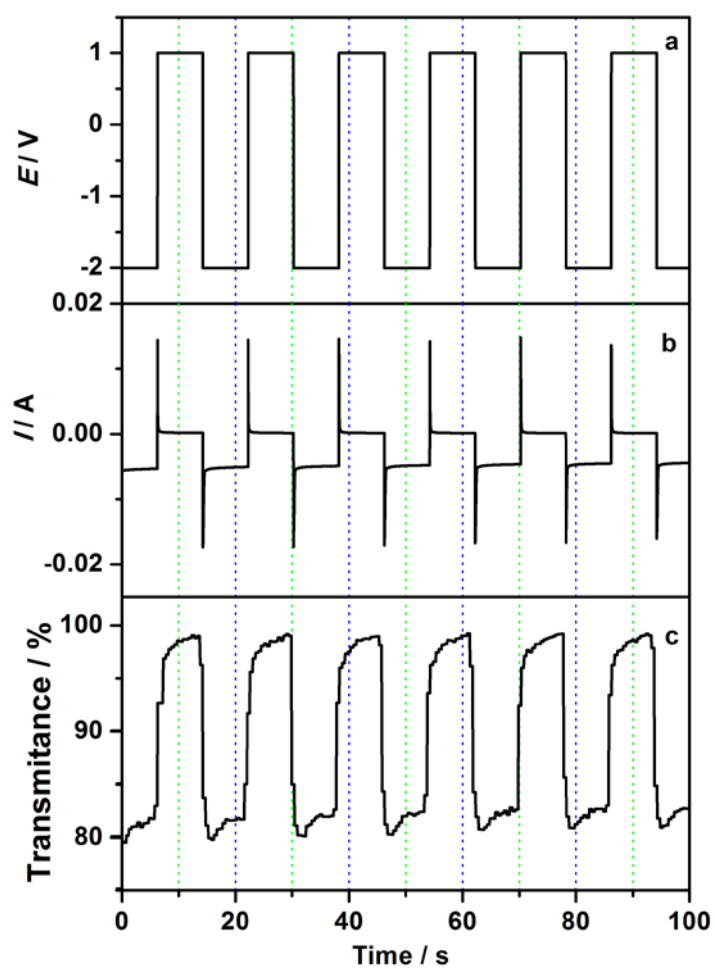

**Figure S9** Potential (a), current (b) and absorbance (c) at 550 nm of the smart window based on  $S_5W_{30}$  during the subsequent double-potential steps between 1.0 and -2.0V.

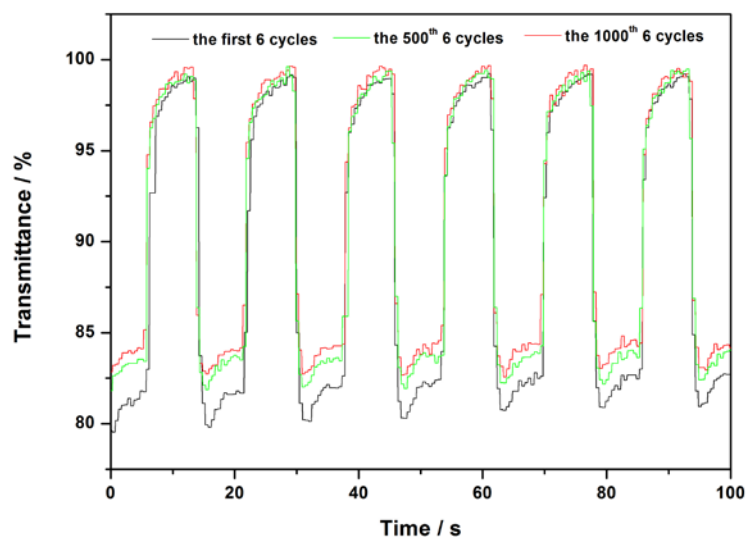

**Figure S10** The stability and reversibility of the  $S_5W_{30}$ -based smart windows. The black line represents the first 6 cycles of the double-potential steps; the green line represents the 500<sup>th</sup> 6 cycles of the double-potential steps; the red line represents the 1000<sup>th</sup> 6 cycles of the double-potential steps.
